# Supplementary material
Source: publisher figshare collection journal article supplement (https://tandf.figshare.com/ndownloader/files/17480171)
Supplement: Supplementary file 1 [file 17480171]

# Supplementary material


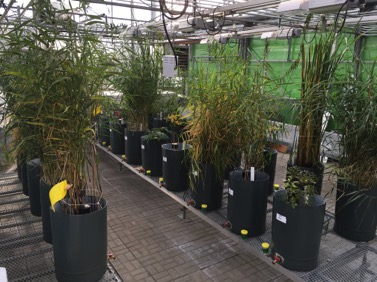

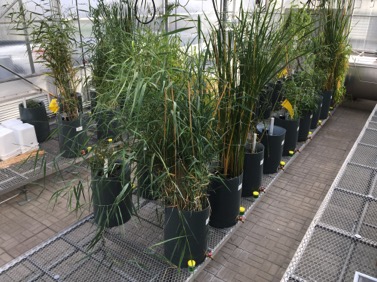


**Figure SM1.** Plan view of the plants’ position and the experimental setup.

**Figure SM2.** *Left Y axes, with related points:* Evapotranspiration rate (L/d) of all mesocosms. Each point represents the mean evapotranspiration of three replicates of the same species. *Right Y axes, with grey histograms:* Greenhouse temperature (°C) during the experiment.
